# Supplementary material for: Modulating nickel-iron active species via dealloying to boost the oxygen evolution reaction
Source: Royal Society of Chemistry journal article supplement (doi:10.1039/d3dt03008c), 2023-12-22
Supplement: d3dt03008c1.pdf [file d3dt03008c1.pdf]

# **Modulating nickel-iron active species via dealloying for boosting oxygen evolution reaction**

Zhuqing Wan<sup>a</sup>, Xiaolong Guo<sup>a\*</sup>, Junying Jiang<sup>a</sup>, Yuci Xin<sup>a</sup>, Benzhen Tang<sup>a</sup>,

Hong Zhang<sup>a</sup>, Yong Wu<sup>a,b\*</sup>, Lei Xia<sup>b</sup>, Peng Yu<sup>a,\*</sup>

<sup>a</sup> College of Physics and Electronic Engineering of Chongqing Normal University, Chongqing Key Laboratory of Optical and Electronic Functional Materials, Chongqing 401331, China

<sup>b</sup> Institute of Materials & Laboratory for Microstructure, Shanghai University, Shanghai 200072, China

\*Corresponding author.

Email address: guoxiaolong@cqnu.edu.cn (X. Guo), wy\_yp@shu.edu.cn (Y. Wu),

pengyu@cqnu.edu.cn (P. Yu)

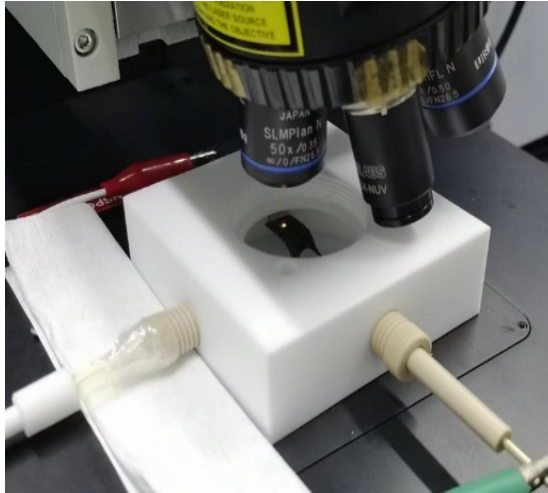

**Fig.S1.** The optical photos of the Raman spectrometer.

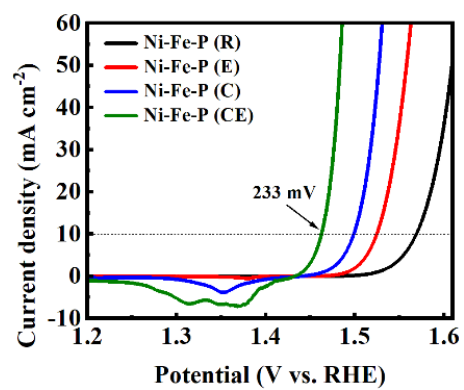

**Fig. S2** LSV curves of the Ni-Fe-P ribbons. Note: LSV curves are scanned from high voltage to low voltage.

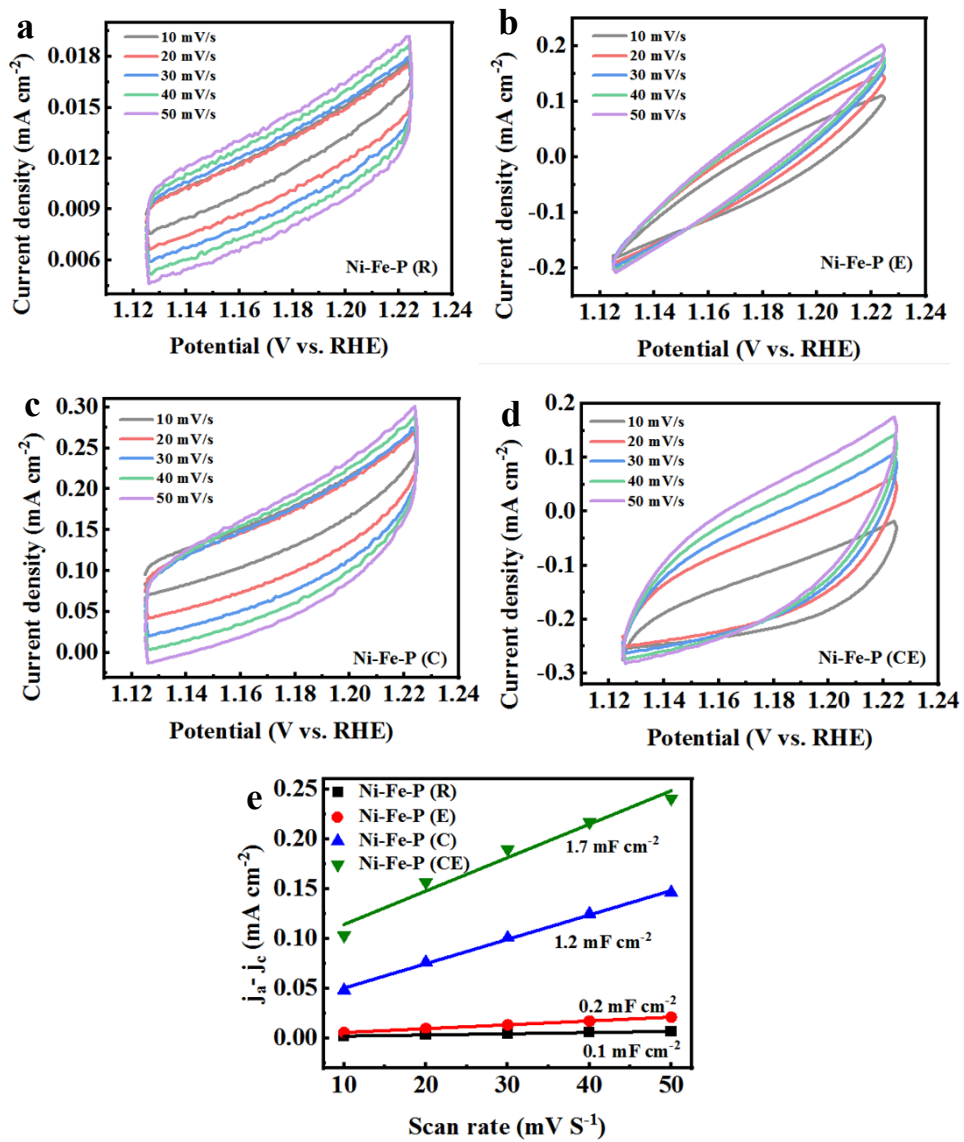

Fig.  
S3  
(a-d)

Cyclic voltammograms at  $E = 1.125\text{--}1.225$  V vs. RHE and (e) scan rate dependence of the current density at  $E = 1.18$  V vs. RHE for assessing the double layer capacitance.

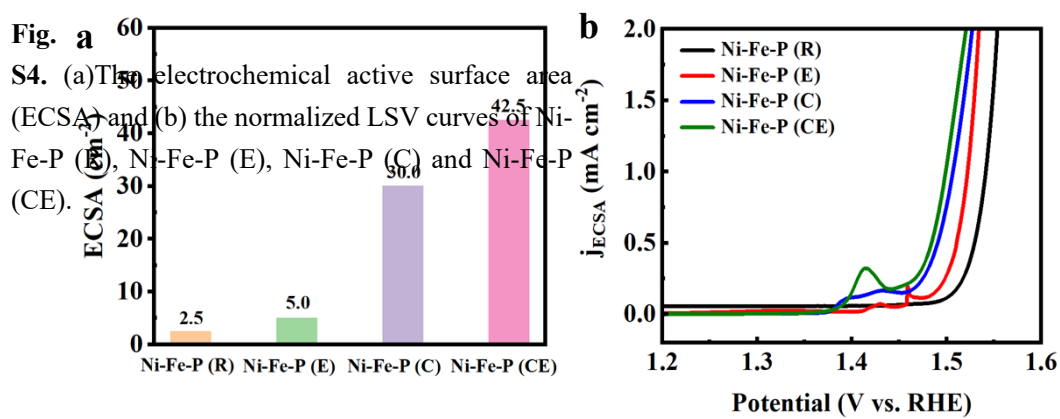

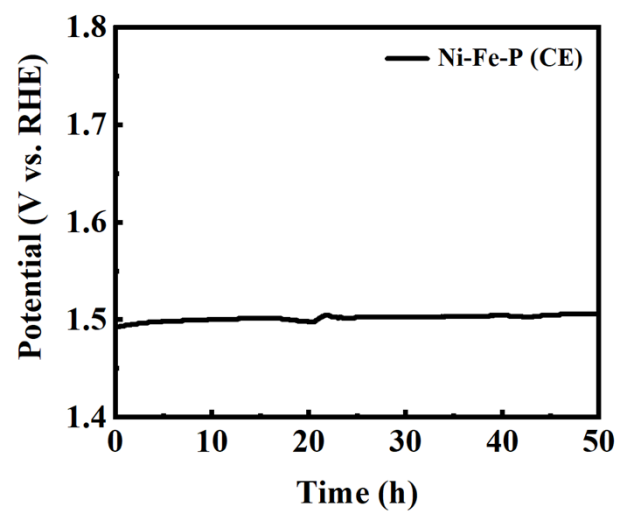

**Fig. S5** The stability test of Ni-Fe-P (CE) at  $10 \text{ mA cm}^{-2}$  for 50 hours.

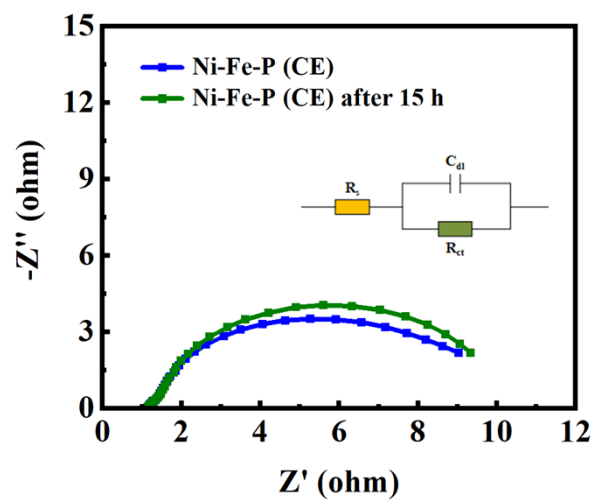

**Fig. S6.** Electrochemical impedance spectroscopy (EIS) of Ni-Fe-P (CE) before and after stability test.

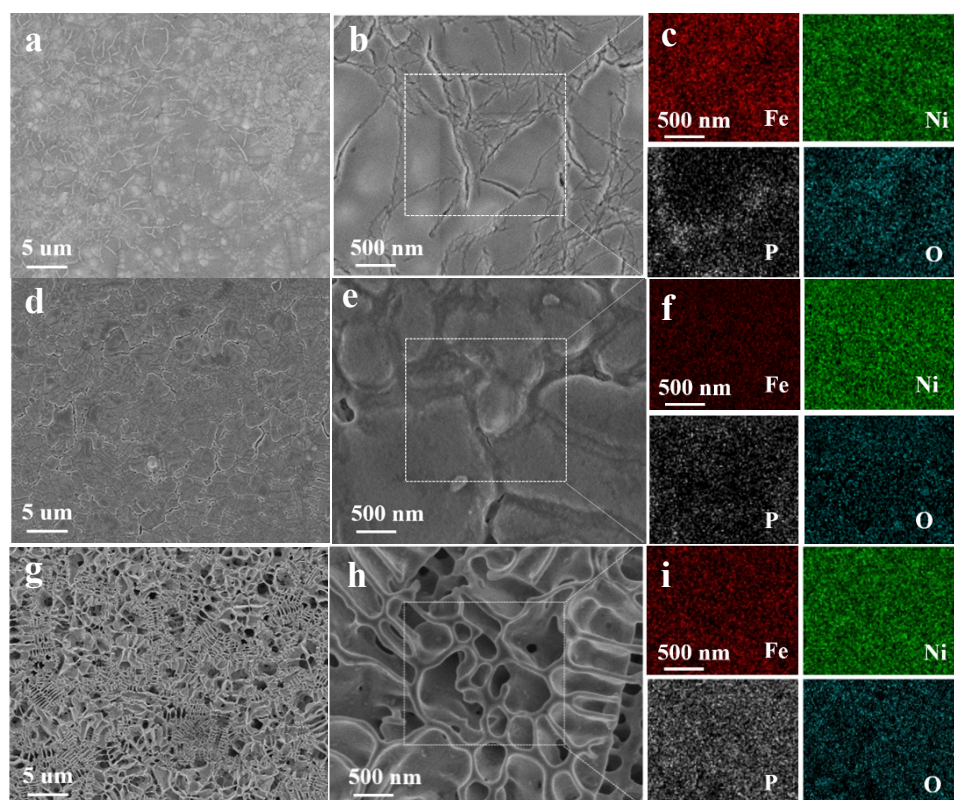

**Fig. S7.** SEM images and EDS mapping of (a-c) Ni-Fe-P (R) , (d-f) Ni-Fe-P (C) and (g-i) Ni-Fe-P (E) after the stability tests (15 h).



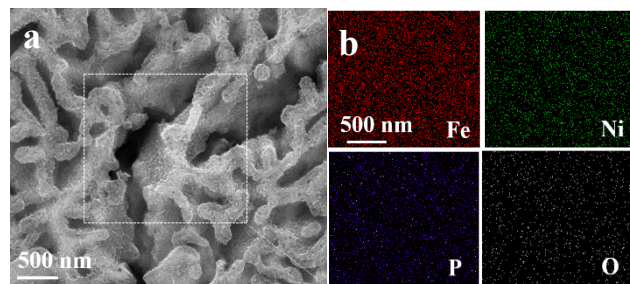

**Fig. S8.** SEM images and EDS mapping of Ni-Fe-P (CE) after the stability tests (15 h).

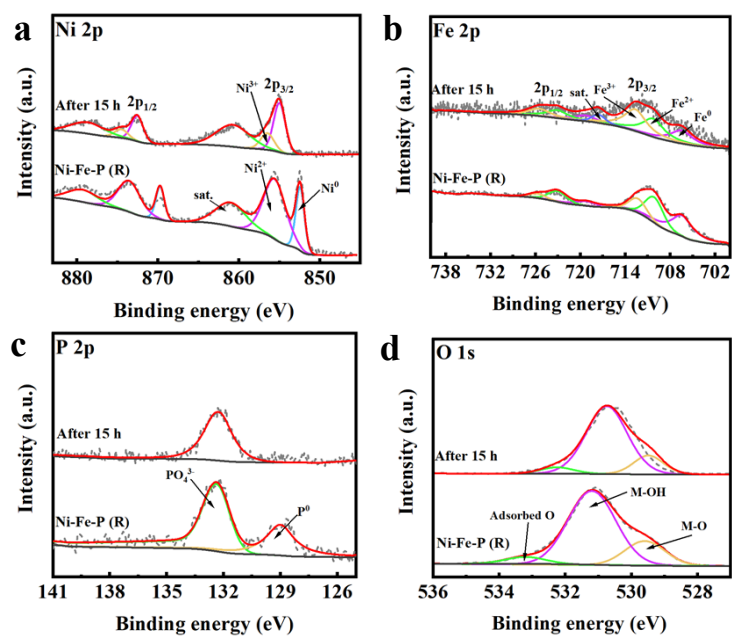

**Fig. S9** XPS spectra of Ni-Fe-P (R) before and after the stability test (15 h): (a) Ni 2p, (b) Fe 2p, (c) P 2p, and (d) O 1s.

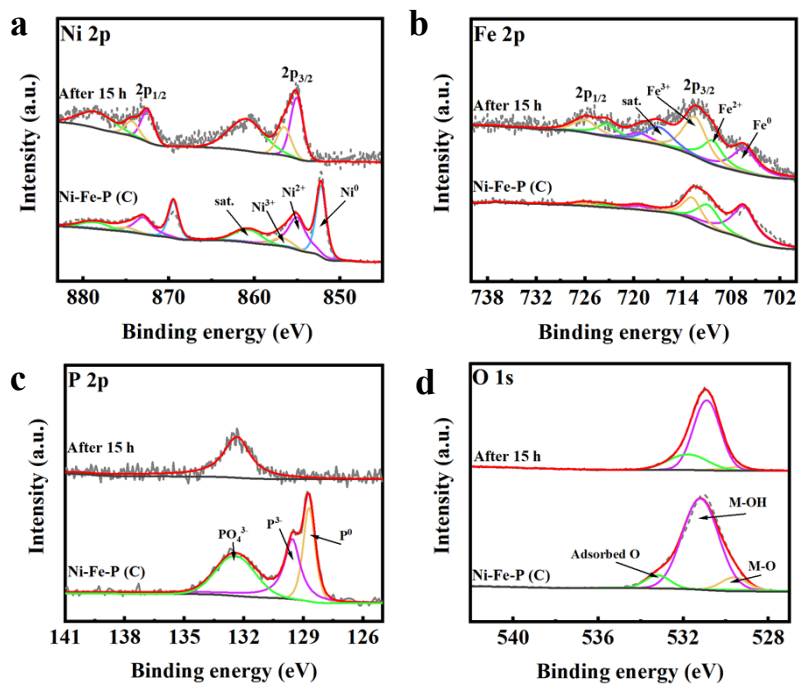

**Fig. S10.** XPS spectra of Ni-Fe-P (C) before and after the stability test (15 h): (a) Ni 2p, (b) Fe 2p, (c) P 2p, and (d) O 1s.

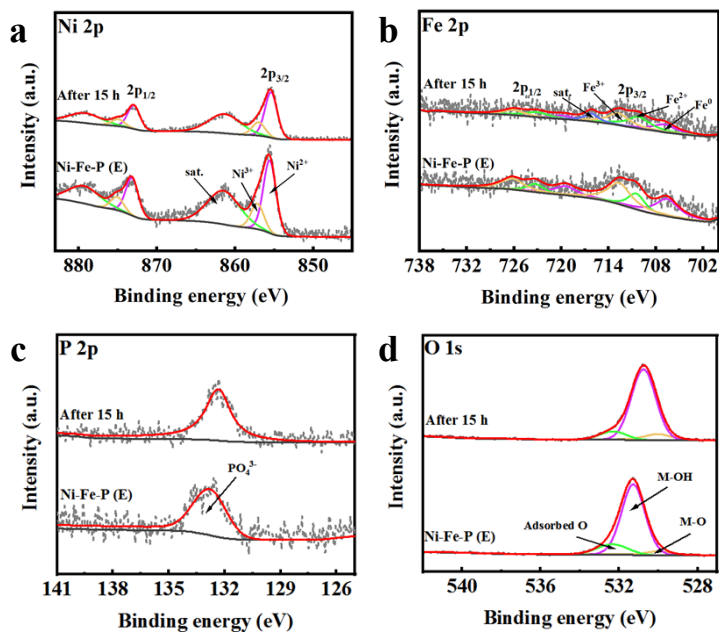

**Fig. S11.** XPS spectra of Ni-Fe-P (E) before and after the stability test (15 h): (a) Ni 2p, (b) Fe 2p, (c) P 2p, and (d) O 1s.

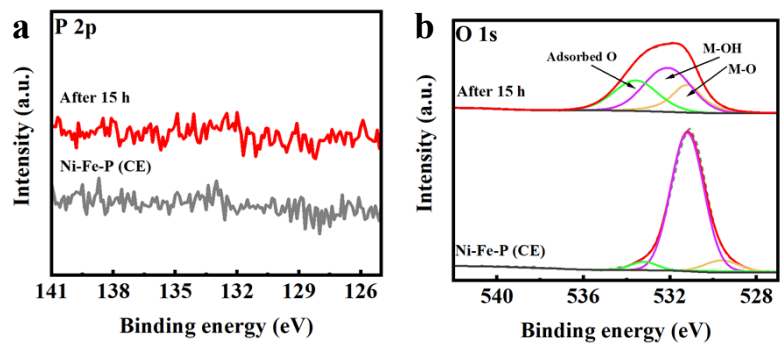

**Fig. S12.** XPS spectra of Ni-Fe-P (CE) before and after stability test: (c) P and (d) O.

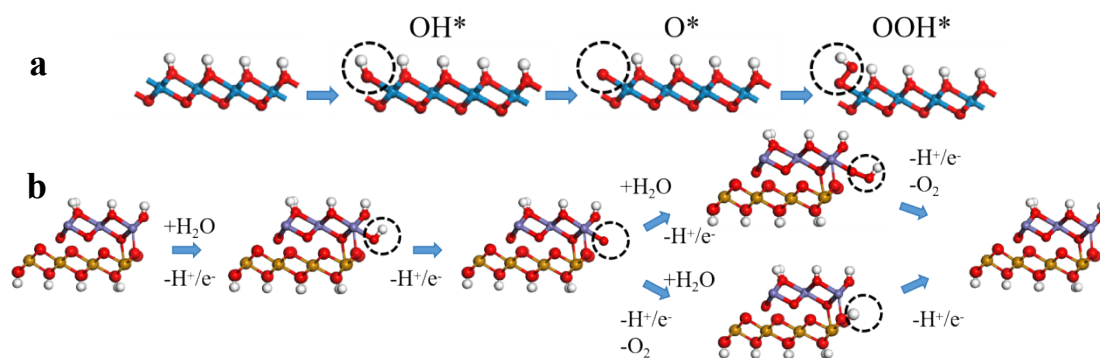

**Fig. S13.** (a) Standard orientation of the NiOOH model and the adsorbed OH\*, O\* and OOH\* intermediates on the Ni sites of NiOOH model. (b) Standard orientation of the NiOOH/FeOOH model and the adsorbed OH\*, O\* and OOH\* intermediates on the Fe-Ni dual sites of NiOOH/FeOOH model. Brown balls: Fe atoms; Blue balls: Ni atoms; Red balls: O atoms; White balls: H atoms.

For OER catalyzed by metal oxyhydroxides, the commonly mechanism involves four consecutive proton-coupled electron transfer (PCET), where the adsorption of OH\*, O\*, and OOH\* is successively on the one site [1]. The mechanism diagram is shown in **Fig. S13a**, which is suitable for the monospecies NiOOH derived by Ni-Fe-P (R). The OER mechanism of the NiOOH/FeOOH species (Ni-Fe-P (CE)) is bifunctional mechanism [2]. This mechanism involves two catalytic sites, often based on two different metal ions, which work in a cooperative manner (**Fig. S13b**). One site (such as, Fe sites) provides the electrophilic M=O entity, while the other side (such as, Ni sites) provides a hydrogen atom acceptor.

**Table S1.** The content of Ni, Fe, P, and O on the surface and cross-section of Ni-Fe-P (CE).

|           | Surface | Cross-section |
|-----------|---------|---------------|
| Ni (at.%) | 42.3    | 50.2          |
| Fe (at.%) | 9.0     | 21.7          |
| P (at.%)  | 7.1     | 5.5           |
| O (at.%)  | 41.5    | 22.6          |

**Table S2.** The peak positions of the various ions in the XPS results.

|                 | Fe <sup>0</sup><br>(eV) | Fe <sup>2+</sup><br>(eV) | Fe <sup>3+</sup><br>(eV) | Ni <sup>0</sup><br>(eV) | Ni <sup>2+</sup><br>(eV) | Ni <sup>3+</sup><br>(eV) | PO <sub>4</sub> <sup>3-</sup><br>(eV) | P <sup>3-</sup><br>(eV) | P <sup>0</sup><br>(eV) |
|-----------------|-------------------------|--------------------------|--------------------------|-------------------------|--------------------------|--------------------------|---------------------------------------|-------------------------|------------------------|
| Ni-Fe-P (R)     | 706.5                   | 710.1                    | 712.8                    | 852.5                   | 855.4                    | \                        | 132.8                                 | \                       | 128.9                  |
| Ni-Fe-P (E)     | 706.3                   | 710.5                    | 712.7                    | 852.3                   | 855.0                    | 856.6                    | 132.5                                 | \                       | 128.8                  |
| Ni-Fe-P (C)     | 706.6                   | 710.9                    | 712.8                    | \                       | 855.7                    | 857.1                    | 132.4                                 | 129.5                   | 128.8                  |
| Ni-Fe-P<br>(CE) | 706.6                   | 710.5                    | 712.9                    | \                       | 855.6                    | 856.7                    | \                                     | \                       | \                      |



**Table S3** Comparison of OER performance with recently reported ribbons and other oxide electrocatalysts in alkaline media.

| Catalysts                                                                                         | Overpotentials (mV)           | References |
|---------------------------------------------------------------------------------------------------|-------------------------------|------------|
| Dealloyed Ni-Fe-P ribbon                                                                          | 234 mV@10 mA cm <sup>-2</sup> | This work  |
| Na <sub>2</sub> Co <sub>0.75</sub> Fe <sub>0.25</sub> P <sub>2</sub> O <sub>7</sub> /C            | 300 mV@10 mA cm <sup>-2</sup> | [3]        |
| NPs                                                                                               |                               |            |
| DR-NiOOH                                                                                          | 281 mV@10 mA cm <sup>-2</sup> | [4]        |
| CR-NiOOH                                                                                          | 278 mV@10 mA cm <sup>-2</sup> | [5]        |
| α-Fe <sub>2</sub> O <sub>3</sub>                                                                  | 317 mV@10 mA cm <sup>-2</sup> | [6]        |
| Glassy Ni <sub>40</sub> Fe <sub>40</sub> P <sub>20</sub>                                          | 270 mV@10 mA cm <sup>-2</sup> | [7]        |
| np-NiFeP                                                                                          | 287 mV@10 mA cm <sup>-2</sup> | [8]        |
| Acid treated NiFeP                                                                                | 219 mV@10 mA cm <sup>-2</sup> | [9]        |
| glassy FeNiCoP                                                                                    | 281 mV@10 mA cm <sup>-2</sup> | [10]       |
| Fe <sub>40</sub> Ni <sub>20</sub> Co <sub>20</sub> P <sub>15</sub> C <sub>5</sub>                 | 278 mV@10 mA cm <sup>-2</sup> | [11]       |
| (Ni <sub>0.67</sub> Fe <sub>0.33</sub> ) <sub>4</sub> P <sub>5</sub>                              | 245 mV@10 mA cm <sup>-2</sup> | [12]       |
| Treated FeNiPC                                                                                    | 289 mV@10 mA cm <sup>-2</sup> | [13]       |
| Ni <sub>59</sub> Cu <sub>19</sub> P <sub>9</sub>                                                  | 307 mV@10 mA cm <sup>-2</sup> | [14]       |
| nanocages FeNiPBO                                                                                 | 236 mV@10 mA cm <sup>-2</sup> | [15]       |
| CoFeP NFs/NPCNT                                                                                   | 278 mV@10 mA cm <sup>-2</sup> | [16]       |
| FeP <sub>4</sub> cubes                                                                            | 283 mV@10 mA cm <sup>-2</sup> | [17]       |
| Fe-Co-P                                                                                           | 269 mV@10 mA cm <sup>-2</sup> | [18]       |
| FeNi(VO <sub>4</sub> ) <sub>x</sub> @NF                                                           | 274 mV@10 mA cm <sup>-2</sup> | [19]       |
| Ni <sub>0.8</sub> Co <sub>0.1</sub> Fe <sub>0.1</sub> O <sub>x</sub> H <sub>y</sub>               | 239 mV@10 mA cm <sup>-2</sup> | [20]       |
| Ni <sub>40</sub> Fe <sub>40</sub> B <sub>20</sub>                                                 | 319 mV@10 mA cm <sup>-2</sup> | [21]       |
| Ni <sub>14</sub> Co <sub>14</sub> Fe <sub>14</sub> Mo <sub>6</sub> Mn <sub>52</sub>               | 350 mV@10 mA cm <sup>-2</sup> | [22]       |
| Fe <sub>50</sub> Ni <sub>30</sub> P <sub>13</sub> C <sub>7</sub>                                  | 289 mV@10 mA cm <sup>-2</sup> | [23]       |
| np-(Ni <sub>0.75</sub> Fe <sub>0.25</sub> ) <sub>4</sub> P <sub>5</sub>                           | 280 mV@10 mA cm <sup>-2</sup> | [24]       |
| (Ni <sub>0.4</sub> Fe <sub>0.4</sub> B <sub>0.2</sub> ) <sub>100-x</sub> Ru <sub>x</sub><br>(x=0) | 295 mV@10 mA cm <sup>-2</sup> | [25]       |
| Ni <sub>40</sub> Fe <sub>20</sub> Co <sub>20</sub> P <sub>20</sub>                                | 244 mV@10 mA cm <sup>-2</sup> | [26]       |

**Table S4** Charge-transfer resistance ( $R_{ct}$ ) of the ribbons in the electrochemical impedance spectroscopy (EIS).

| Sample       | $R_s$ | $R_{ct}$ (ohm) |
|--------------|-------|----------------|
| Ni-Fe-P (R)  | 1.339 | 2250           |
| Ni-Fe-P (E)  | 1.285 | 525.7          |
| Ni-Fe-P (C)  | 1.473 | 17.1           |
| Ni-Fe-P (CE) | 1.173 | 8.99           |

**Table S5** The parameters of the electrochemical impedance spectroscopy (EIS) before and after stability test. Note:  $R_s$  is the solution resistance (small arc in front),  $R_{ct}$  is the interface resistance (circular arc in the back), and the magnitude of  $R_p$  can reflect the corrosion rate. The capacitance CPE-T is a double-layer capacitance, and CPE-P is the dispersion index.

| Sample                               | $R_s$ | $R_{ct}$ (ohm) | CPE-T  | CPE-P |
|--------------------------------------|-------|----------------|--------|-------|
| Ni-Fe-P (CE)                         | 1.173 | 8.99           | 0.4366 | 0.85  |
| Ni-Fe-P (CE)<br>after stability test | 1.177 | 9.94           | 0.3990 | 0.85  |

**Table S6** The ratios of Ni and Fe ions for Ni-Fe-P (R), Ni-Fe-P (C), Ni-Fe-P (E) and Ni-Fe-P (CE).

|        |                  | Ni-Fe-P | Ni-Fe-P | Ni-Fe-P | Ni-Fe-P | Ni-Fe-P    | Ni-Fe-P    | Ni-Fe-P    | Ni-Fe-P    |
|--------|------------------|---------|---------|---------|---------|------------|------------|------------|------------|
|        |                  | (R)     | (C)     | (E)     | (CE)    | (R)        | (C)        | (E)        | (CE)       |
|        |                  |         |         |         |         | After 15 h | After 15 h | After 15 h | After 15 h |
|        | Fe <sup>0</sup>  | 53.29   | 57.26   | 28.90   | 28.63   | 24.02      | 29.9       | 24.64      | 27.1       |
| Fe     | Fe <sup>2+</sup> | 4.41    | 11.65   | 44.36   | 29.02   | 34.28      | 26.0       | 38.23      | 30.58      |
| (at.%) | Fe <sup>3+</sup> | 42.3    | 31.1    | 26.62   | 42.35   | 41.7       | 44.15      | 37.12      | 42.34      |
|        | Ni <sup>0</sup>  | 27.3    | 49.8    | 0       | 0       | 0          | 0          | 0          | 0          |
| Ni     | Ni <sup>2+</sup> | 72.7    | 41.9    | 73.4    | 58.4    | 72.26      | 75.22      | 64.84      | 46.3       |
| (at.%) | Ni <sup>3+</sup> | 0       | 8.3     | 26.6    | 41.6    | 27.74      | 24.78      | 35.16      | 53.7       |

**Table S7.** The values of  $\delta$  (Ni-O)/Ni-O and Fe-O/Ni-O under different potentials vs. Ag/AgCl in in-situ Raman test for Ni-Fe-P (R).

|        | $\delta$ (Ni-O)/Ni-O | Fe-O/Ni-O |
|--------|----------------------|-----------|
| 0.30 V | 0                    | 0         |
| 0.35 V | 0                    | 0         |
| 0.40 V | 0                    | 0         |
| 0.45 V | 0                    | 0         |
| 0.50 V | 0.68                 | 0         |
| 0.55 V | 0.55                 | 0         |
| 0.60 V | 0.72                 | 0         |

**Table S8.** The value of  $\delta$  (Ni-O)/Ni-O and Fe-O/Ni-O under different potentials vs. Ag/AgCl in in-situ Raman test for Ni-Fe-P (C).

|        | $\delta$ (Ni-O)/Ni-O | Fe-O/Ni-O |
|--------|----------------------|-----------|
| 0.30 V | 0                    | 0.27      |
| 0.35 V | 0                    | 0.12      |
| 0.40 V | 0                    | 0.18      |
| 0.45 V | 0                    | 0.34      |
| 0.50 V | 0.74                 | 0         |
| 0.55 V | 0.69                 | 0         |
| 0.60 V | 0.70                 | 0.05      |

**Table S9.** The value of  $\delta$  (Ni-O)/Ni-O and Fe-O/Ni-O under different potentials vs. Ag/AgCl in in-situ Raman test for Ni-Fe-P (CE).

|        | $\delta$ (Ni-O)/Ni-O | Fe-O/Ni-O |
|--------|----------------------|-----------|
| 0.30 V | 0                    | 0.14      |
| 0.35 V | 0                    | 0.21      |
| 0.40 V | 0                    | 0.12      |
| 0.45 V | 0                    | 0.17      |
| 0.50 V | 0                    | 0.19      |
| 0.55 V | 0                    | 0.25      |
| 0.60 V | 0                    | 0.21      |

## References

- [1] I. C. Man, H.-Y. Su, F. Calle-Vallejo, H. A. Hansen, J. I. Martínez, N. G. Inoglu, J. Kitchin, T. F. Jaramillo, J. K. Nørskov, J. Rossmeisl, Universality in Oxygen Evolution Electrocatalysis on Oxide Surfaces, *ChemCatChem* 2011, 3, 1159-1165.
- [2] L. C. Bai, Dr. S. Lee, X. L. Hu, Spectroscopic and Electrokinetic Evidence for a Bifunctional Mechanism of the Oxygen Evolution Reaction; An Unconventional Iron Nickel Catalyst for the Oxygen Evolution Reaction, *Angew. Chem. Int. Ed.*, 2021, 6, 3095-3103.
- [3] H. J. Song, H. Yoon, B. Ju, D. Y. Lee, D. W. Kim, Electrocatalytic Selective Oxygen Evolution of Carbon-Coated  $\text{Na}_2\text{Co}_{1-x}\text{Fe}_x\text{P}_2\text{O}_7$  Nanoparticles for Alkaline Seawater Electrolysis, *ACS Catal.*, 2020, 10, 702-709.
- [4] X. Liu, K. Ni, B. Wen, R. Guo, C. Niu, J. Meng, Q. Li, P. Wu, Y. Zhu, X. Wu, L. Mai, Deep Reconstruction of Nickel-Based Precatalysts for Water Oxidation Catalysis, *ACS Energy Lett.*, 2019, 4, 2585-2592.
- [5] X. Liu, J. Meng, K. Ni, R. Guo, F. Xia, J. Xie, X. Li, B. Wen, P. Wu, M. Li, J. Wu, X. Wu, L. Mai, D. Zhao, Complete Reconstruction of Hydrate Pre-Catalysts for Ultrastable Water Electrolysis in Industrial-Concentration Alkali Media, *Cell Reports Phys. Sci.*, 2020, 1, 100241.
- [6] H. Wu, T. Yang, Y. H. Du, L. Shen, G. W. Ho, Identification of Facet-Governing Reactivity in Hematite for Oxygen Evolution, *Adv. Mater.*, 2018, 30, 1804341.
- [7] Y. Tan, F. Zhu, H. Wang, Y. Tian, A. Hirata, T. Fujita, M. Chen, Noble-Metal-Free Metallic Glass as a Highly Active and Stable Bifunctional Electrocatalyst for Water Splitting, *Adv. Mater. Interfaces*, 2017, 4, 1601086.
- [8] Y. Pang, W. Xu, S. Zhu, Z. Cui, Y. Liang, Z. Li, S. Wu, C. Chang, S. Luo, Self-supporting amorphous nanoporous NiFeCoP electrocatalyst for efficient overall water splitting, *J. Mater. Sci. Technol.*, 2021, 82, 96-104.
- [9] F. Hu, S. Zhu, S. Chen, Y. Li, L. Ma, T. Wu, Y. Zhang, C. Wang, C. Liu, X. Yang, L. Song, X. Yang, Y. Xiong, Amorphous Metallic NiFeP: A Conductive Bulk Material Achieving High Activity for Oxygen Evolution Reaction in Both Alkaline and Acidic Media, *Adv. Mater.*, 2017, 29, 1606570.
- [10] S. Jiang, L. Zhu, Z. Yang, Y. Wang, Enhanced electrocatalytic performance of FeNiCoP amorphous alloys as oxygen-evolving catalysts for electrolytic water splitting application, *Electrochim. Acta*, 2021, 368, 137618.
- [11] K. S. Aneeshkumar, J. Tseng, X. Liu, J. Tian, D. Diao, J. Shen, Electrochemically dealloyed nanoporous  $\text{Fe}_{40}\text{Ni}_{20}\text{Co}_{20}\text{P}_{15}\text{C}_5$  metallic glass for efficient and stable electrocatalytic hydrogen and oxygen generation, *RSC Adv.*, 2021, 11, 7369-7380.
- [12] W. Xu, S. Zhu, Y. Liang, Z. Cui, X. Yang, A nanoporous metal phosphide catalyst for bifunctional water splitting, *J. Mater. Chem. A*, 2018, 6, 5574-5579.
- [13] Z. Jia, Y. Zhao, Q. Wang, F. Lyu, X. Tian, S. Liang, L. Zhang, J. Luan, Q. Wang, L. Sun, T. Yang, B. Shen, Nanoscale Heterogeneities of Non-Noble Iron-Based Metallic Glasses toward Efficient Water Oxidation at Industrial-Level Current Densities, *ACS Appl. Mater. Interfaces*, 2022, 14, 10288-10297.
- [14] B. K. Kim, S. Kim, S. K. Cho, J. J. Kim, Enhanced catalytic activity of electrodeposited Ni-Cu-P toward oxygen evolution reaction, *Appl. Catal. B: Environ.*, 2018, 237, 409-415.
- [15] H. Ren, X. Sun, C. Du, J. Zhao, D. Liu, W. Fang, S. Kumar, R. Chua, S. Meng, P. Kidkhunthod, L. Song, S. Li, S. Madhavi, Q. Yan, Amorphous Fe-Ni-P-B-O nanocages as efficient electrocatalysts for oxygen evolution reaction, *ACS Nano*, 2019, 13, 12969-12979.
- [16] W. Li, Y. Chen, B. Yu, Y. Hu, X. Wang, D. Yang, 3D hollow Co-Fe-P nanoframes immobilized on N, P-doped CNT as an efficient electrocatalyst for overall water splitting, *Nanoscale*, 2019, 11, 17031-17040.
- [17] Q. He, H. Xie, Z. u. Rehman, C. Wang, P. Wan, H. Jiang, W. Chu, L. Song, Highly Defective Fe-Based Oxyhydroxides from Electrochemical Reconstruction for Efficient Oxygen Evolution Catalysis, *ACS Energy Lett.*, 2018, 3, 861-868.



- [18] H. Zhang, W. Zhou, J. Dong, X.F. Lu, X.W. Lou, Intramolecular electronic coupling in porous iron cobalt (oxy)phosphide nanoboxes enhances the electrocatalytic activity for oxygen evolution, *Energy Environ. Sci.*, 2019, 12, 3348-3355.
- [19] K. Dastafkan, Q. Meyer, X. Chen, C. Zhao, Efficient Oxygen Evolution and Gas Bubble Release Achieved by a Low Gas Bubble Adhesive Iron–Nickel Vanadate Electrocatalyst, *Small*, 2020, 16, 2002412.
- [20] Q. Zhao, J. Yang, M. Liu, R. Wang, G. Zhang, H. Wang, H. Tang, C. Liu, Z. Mei, H. Chen, F. Pan, Tuning Electronic Push/Pull of Ni-Based Hydroxides To Enhance Hydrogen and Oxygen Evolution Reactions for Water Splitting, *ACS Catal.*, 2018, 8, 5621-5629.
- [21] H.-L. Li, Y. -Y. Wang, C.-M. Liu, S.-M. Zhang, H.-F. Zhang, Z.-W. Zhu, Enhanced OER performance of NiFeB amorphous alloys by surface self-reconstruction, *Int. J. Hydrog. Energy*, 2022, 47, 20718-20728.
- [22] H. Liu, H. Y. Qin, J. L. Kang, L. Y. Ma, G. X. Chen, Q. Huang, Z. J. Zhang, E. Z. Liu, H. M. Lu, J. X. Li, N. Q. Zhao, A freestanding nanoporous NiCoFeMoMn high-entropy alloy as an efficient electrocatalyst for rapid water splitting, *Chem. Eng. J.*, 2022, 435, 134898.
- [23] Z. Jia, Y. L. Zhao, Q. Wang, F. C. Lyu, X. B. Tian, S.-X. Liang, L.-C. Zhang, J. H. Luan, Q. Q. Wang, L. G. Sun, T. Yang, B. L. Shen, Nanoscale heterogeneities of non-noble iron-based metallic glasses toward efficient water oxidation at industrial-level current densities, *ACS Appl. Mater. Interfaces*, 2022, 14, 10288–10297.
- [24] W. Xu, S. L. Zhu, Y. Q. Liang, Z. D. Cui, X. J. Yang, A. Inoue, A nanoporous metal phosphide catalyst for bifunctional water splitting, *J. Mater. Chem. A*, 2018, 6, 5574-5579.
- [25] G. G. Xi, L. Zuo, X. Li, Y. Jin, R. Li, T. Zhang, In-situ constructed Ru-rich porous framework on NiFe-based ribbon for enhanced oxygen evolution reaction in alkaline solution, *J. Mater. Sci. Technol.*, 2021, 70, 197-204.
- [26] Y. Pang, W. Xu, S. L. Zhu, Z. D. Cui, Y. Q. Liang, Z. Y. Li, S. L. Wu, C. Chang, S. Y. Luo, Self-supporting amorphous nanoporous NiFeCoP electrocatalyst for efficient overall water splitting, *J. Mater. Sci. Technol.*, 2021, 82, 96-104.
- [27] Y. Wu, Q. X. Chen, Q. Zhang, C. Bai, J. X. Peng, B. Z. Tang, D. M. Li, D. Ding, L. Xia, X. L. Guo, P. Yu, Self-supported electrode Fe<sub>35</sub>Co<sub>20</sub>Ni<sub>20</sub>Mo<sub>20</sub>Si<sub>5</sub> alloy ribbon: Electronic structure modulating oxygen evolution reaction, *J. Alloys Compd.*, 2022, 911, 164993.
